# Supplementary material for: Polysaccharide from Patinopecten yessoensis Skirt Boosts Immune Response via Modulation of Gut Microbiota and Short-Chain Fatty Acids Metabolism in Mice
Source: MDPI journal article supplement (doi:10.3390/foods10102478), 2021-10-16
Supplement: s1 [file s1]

**Table S1.** Chemical characterization of PS

| Content                       | Parameters     | Value                 |
|-------------------------------|----------------|-----------------------|
| Essential component (%)       | moisture       | 11.12±0.87            |
|                               | ash content    | 5.08±0.05             |
|                               | protein        | 19.48±2.04            |
|                               | total sugar    | 61.32±1.30            |
|                               | reducing sugar | 0.89±0.03             |
| Mass ratio of monosaccharides | mannose        | 3.36                  |
|                               | glucosamine    | 39.44                 |
|                               | galactosamine  | 9.72                  |
|                               | glucose        | 20.85                 |
|                               | galactose      | 26.63                 |
| Molecular weight (Da)         |                | 2.538×10 <sup>5</sup> |
